# Supplementary material
Source: Springer Nature journal article supplement (https://www.springermedizin.de/resource/supplementary/12885_2008_1166_MOESM7_ESM.pdf/9471284)

**A – Bone (week 6)**

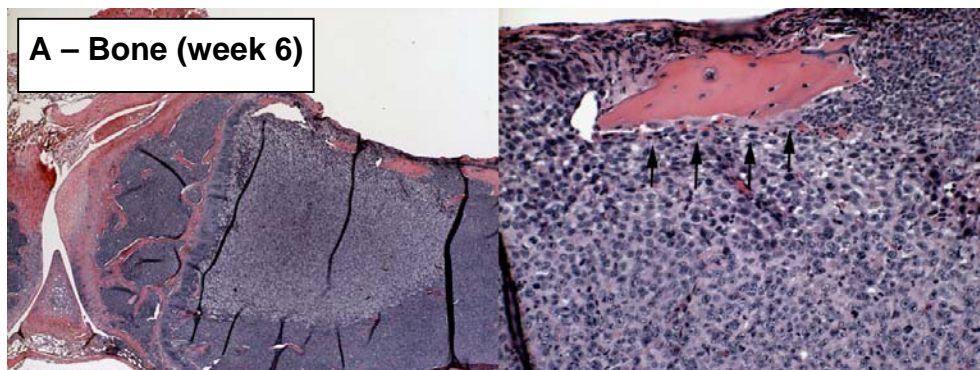

**B – Bone (week 6)**

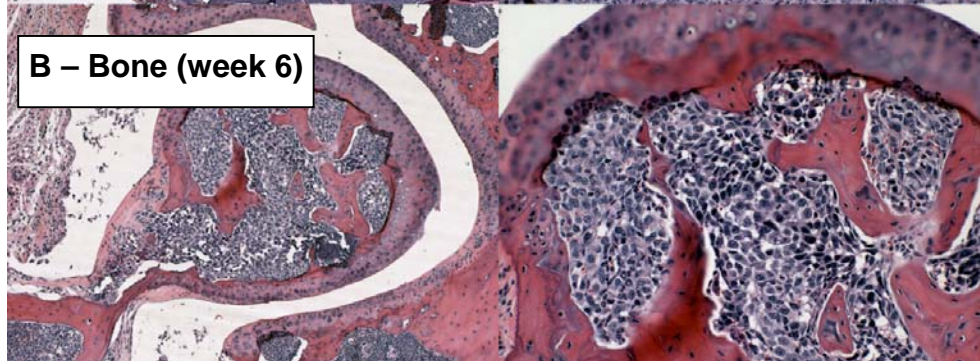

Supplement: MOESM7 [file 9471284]
